# Supplementary material for: A Missense Mutation in the Collagen Triple Helix of EDA Is Associated with X-Linked Recessive Hypohidrotic Ectodermal Dysplasia in Fleckvieh Cattle
Source: MDPI journal article supplement (doi:10.3390/genes15010008), 2023-12-20
Supplement: s1 [file s1]

**Table S5.** Primer sequences used for validation of the *EDA*-associated mutation. The EDA:g.85716041G>A variant was validated using a restriction fragment length polymorphism (RFLP). Primer pairs, amplicon size (AS) in base pairs (bp), annealing temperature (AT), restriction enzyme and incubation temperature (IT) are given.

| Gene       | Polymorphism  | Forward primer (5'-3') | Reverse primer (5'-3') | AS<br>(bp) | AT<br>(°C) | Restriction<br>enzyme | IT<br>(°C) |
|------------|---------------|------------------------|------------------------|------------|------------|-----------------------|------------|
| <i>EDA</i> | g.85716041G>A | CAACTGTTATGGGACCACCTG  | TCCAGGAATCAAACCAGTGTC  | 328        | 66         | NlaIV                 | 37         |
