# Supplementary material for: A Missense Mutation in the Collagen Triple Helix of EDA Is Associated with X-Linked Recessive Hypohidrotic Ectodermal Dysplasia in Fleckvieh Cattle
Source: MDPI journal article supplement (doi:10.3390/genes15010008), 2023-12-20
Supplement: s1 [file s1]

**Table S2.** Breed of the dam, number of teeth present and relationships among cases of previously reported cattle with X-linked hypohidrotical ectodermal dysplasia (XHED).

| References                   | Breed of the dam                   | Case numbers | Incisivi | Premolars |       | Age at examination of the teeth | Ancestry                                                                 |
|------------------------------|------------------------------------|--------------|----------|-----------|-------|---------------------------------|--------------------------------------------------------------------------|
|                              |                                    |              |          | Upper     | Lower |                                 |                                                                          |
|                              |                                    |              |          | jaw       | jaw   |                                 |                                                                          |
| Drieux et al., 1950 [48]     | Normande-Maine-Anjou               | 1            | 0        | 2         | 0     | Six weeks, six month            | Full sibling to case 2                                                   |
|                              |                                    | 2            | 0        | 0         | 0     | Five weeks                      | Full sibling to case 1                                                   |
|                              |                                    | 3            | 0        |           | 0     | Three days                      | Descendant of the maternal half-sister to case 1 and 2                   |
| Rieck, 1985 [3]              | German Holstein x Holstein Frisian | 1            | 0        | 4         | 1     | Three month                     |                                                                          |
| Wijeratne et al., 1988 [4]   | Holstein Frisian                   | 1            | 0        |           |       |                                 | Full sibling to case 2                                                   |
|                              | Holstein Frisian                   | 2            | 0        |           |       |                                 | Full sibling to case 1                                                   |
|                              | Holstein Frisian                   | 3            | 0        |           |       | Six days                        | Descendant of the maternal half-sister to the mother of cases 1, 2 and 4 |
|                              | Holstein Frisian                   | 4            | 0        |           |       | Four days                       | Maternal half-brother of case 1 and case 2                               |
| Braun et al., 1988 [5]       | Fleckvieh x Red Holstein           | 1            | 1        | 2         | 5     | At birth, Eleven months         |                                                                          |
| Drögemüller et al., 2001 [6] | German Holstein                    | 1            | 0        | 4         | 4     | Younger than three months       | Maternal half-brother of cases 2, 3 and 4                                |
| Drögemüller et al., 2002 [7] |                                    | 2            | 0        | 5         | 3     | Younger than 2.5 years          | Maternal half-brother of cases 1, 3 and 4                                |
|                              |                                    | 3            | 0        | 4         | 4     |                                 | Maternal half-brother of cases 1, 2 and 4                                |

|                                                              |                                         |        |        |   |   |              |                                                                                                                           |
|--------------------------------------------------------------|-----------------------------------------|--------|--------|---|---|--------------|---------------------------------------------------------------------------------------------------------------------------|
|                                                              |                                         | 4      | 0      | 4 | 2 |              | Maternal half-brother of cases 1, 2 and 3                                                                                 |
| Drögemüller et al., 2002 [8]<br>Drögemüller et al., 2003 [9] | Red German Holstein                     | 1      | 0      | 2 | 0 | Three months |                                                                                                                           |
| Seeliger et al., 2005 [10]                                   | German Holstein                         | 1      | 0      |   |   | Two years    | Maternal half-brother of cases 1, 2, 3 and 4 which were described by Drögemüller et al. (2001), Drögemüller et al. (2002) |
| Drögemüller et al., 2006 [11] Barlund et al., 2007 [12]      | Red Angus-Charolais-Simmental crossbred | 1      | 0      | 4 | 1 | Two days     |                                                                                                                           |
| Gargani et al., 2011 [16]                                    | Holstein Frisian                        | 1      | 0      |   |   |              | Full sibling to case 2                                                                                                    |
| Karlskov-Mortensen et al., 2011 [13]                         | Danish Red Holstein                     | 2<br>1 | 0<br>0 |   |   |              | Full sibling to case 1                                                                                                    |
|                                                              |                                         |        |        | 2 | 2 | Seven months | Maternal half-brother of case 3                                                                                           |
|                                                              |                                         | 2      |        | 2 | 1 | Stillborn    | Descendant of the maternal half-sister to case 1 and 3                                                                    |
|                                                              |                                         | 3<br>4 | 2      | 2 | 2 | One week     | Maternal half-brother of case 1                                                                                           |
| Ogino et al., 2011 [14]                                      | Holstein                                | 1      | 0      | 2 | 2 | Eight days   | Descendant of the grand-grandmother of cases 1 and 3<br>Maternal half-brother of case 2                                   |
| Ogino et al., 2012 [15]                                      | Holstein<br>Japanese Black              | 2<br>1 |        |   |   |              | Maternal half-brother of case 1                                                                                           |
