# Supplementary material for: A Missense Mutation in the Collagen Triple Helix of EDA Is Associated with X-Linked Recessive Hypohidrotic Ectodermal Dysplasia in Fleckvieh Cattle
Source: MDPI journal article supplement (doi:10.3390/genes15010008), 2023-12-20
Supplement: s1 [file s1]

**Table S3.** Number of animals used in this study. Distribution of the EDA:g.85716041G>A genotypes in 63 animals from the dairy farm with the three cases ascertained and 300 animals from different farms and breeds are given.

| Origin                              |                                   | Sex  |        |         | Breed     | Wildtype |     | Heterozygous | Hemizygous affected males |
|-------------------------------------|-----------------------------------|------|--------|---------|-----------|----------|-----|--------------|---------------------------|
|                                     |                                   | male | female | unknown |           | G/G      | G/- |              |                           |
| Dairy farm where cases were born    | Affected                          | 3    |        |         | Fleckvieh |          |     |              | 3                         |
|                                     | Mandatory carrier (dams of cases) |      | 3      |         | Fleckvieh |          |     | 3            |                           |
|                                     | Other animals                     |      | 57     |         | Fleckvieh | 55       |     | 2            |                           |
| Animals from other farms and breeds |                                   | 96   | 97     |         | Fleckvieh | 193      |     |              |                           |
|                                     |                                   | 6    | 3      | 6       | Holstein  | 15       |     |              |                           |
|                                     |                                   |      | 15     |         | Limpurger | 15       |     |              |                           |
|                                     |                                   | 1    | 1      | 11      | Limousin  | 13       |     |              |                           |
|                                     |                                   |      | 12     |         | Angus     | 12       |     |              |                           |

|    |    |   |                       |    |
|----|----|---|-----------------------|----|
| 12 |    |   | German Brown          | 12 |
| 1  | 11 |   | Charolais             | 12 |
|    | 11 |   | Blonde<br>d'Aquitaine | 11 |
| 3  | 6  |   | German Yellow         | 9  |
| 2  | 2  | 4 | Salers                | 8  |

---
