# Supplementary material for: A Missense Mutation in the Collagen Triple Helix of EDA Is Associated with X-Linked Recessive Hypohidrotic Ectodermal Dysplasia in Fleckvieh Cattle
Source: MDPI journal article supplement (doi:10.3390/genes15010008), 2023-12-20
Supplement: s1 [file s1]

**Table S6.** Development of body weight and daily weight gain of cases 1 and 2 in comparison with data from Fleckvieh. Comparison of the weight development of affected calves with those of male and female Fleckvieh calves according to Pichler and Frickh (2000) [62] and Becher et al. (2012) [44].

| Case 1           |                |                                                                       | Case 2         |                                                                       | Males:<br>Pichler<br>and<br>Frickh<br>(2000) |                                                                       | Females:<br>Becher et<br>al. (2012) |                                                                       |
|------------------|----------------|-----------------------------------------------------------------------|----------------|-----------------------------------------------------------------------|----------------------------------------------|-----------------------------------------------------------------------|-------------------------------------|-----------------------------------------------------------------------|
| Age in<br>months | Body<br>weight | Daily<br>weight<br>gain<br>(g/day) in<br>time<br>interval<br>(months) | Body<br>weight | Daily<br>weight<br>gain<br>(g/day)<br>in time<br>interval<br>(months) | Body<br>weight                               | Daily<br>weight<br>gain<br>(g/day)<br>in time<br>interval<br>(months) | Body<br>weight                      | Daily<br>weight<br>gain<br>(g/day)<br>in time<br>interval<br>(months) |
| 1                |                |                                                                       |                |                                                                       |                                              |                                                                       | 66                                  |                                                                       |
| 2                | 60             |                                                                       | 93             |                                                                       |                                              |                                                                       |                                     |                                                                       |
| 4                | 143.1          |                                                                       | 135            |                                                                       | 154                                          |                                                                       |                                     |                                                                       |
| 4.5              | 147            | 1.160 (2-4.5)                                                         | 143            | 667 (2-4.5)                                                           |                                              |                                                                       | 156                                 | 867 (1-4.5)                                                           |
| 5                | 162            |                                                                       | 153.9          |                                                                       |                                              |                                                                       |                                     |                                                                       |
| 6                | 176            | 548 (4-6)                                                             | 172            | 617 (4-6)                                                             | 218                                          | 1.075 (4-6)                                                           |                                     |                                                                       |
| 7                | 201            |                                                                       | 200            |                                                                       |                                              |                                                                       |                                     |                                                                       |
| 8                | 230            | 900 (6-8)                                                             |                |                                                                       | 297                                          | 1.324 (6-8)                                                           |                                     |                                                                       |
| 9                |                |                                                                       |                |                                                                       |                                              |                                                                       | 300                                 | 1051 (4.5-9)                                                          |
| 10               | 277            | 783 (8-10)                                                            |                |                                                                       | 372                                          | 1.238 (8-10)                                                          |                                     |                                                                       |
| 12               | 342            | 1.083 (10-12)                                                         |                |                                                                       | 437                                          | 1.065 (10-12)                                                         |                                     |                                                                       |
