# Supplementary material for: A Missense Mutation in the Collagen Triple Helix of EDA Is Associated with X-Linked Recessive Hypohidrotic Ectodermal Dysplasia in Fleckvieh Cattle
Source: MDPI journal article supplement (doi:10.3390/genes15010008), 2023-12-20
Supplement: s1 [file s1]

**Table S4.** Primer sequences for the amplification of *EDA*, *EDA2R* and *WNT10A*. Primer pairs, amplicon size (AS) in base pairs (bp) and the annealing temperature (AT) are given.

| Primer (exon/UTR)<br>(F=forward,<br>R=reverse) | Sequence (5' - 3')      | Length | AT (°C) | AS (bp) |
|------------------------------------------------|-------------------------|--------|---------|---------|
| gEDA_Exon1_F                                   | GAGAGGAGCTGCACATGAGG    | 20     |         |         |
| gEDA_Exon1_R                                   | GTCCAGCCGTCGAACTTG      | 18     | 60°C    | 671     |
| gEDA_Exon9_F                                   | AATCCCTTCTTGTGCTCTC     | 21     |         |         |
| gEDA_Exon9_R                                   | GATCAGTGAGAGTGGGAAGACC  | 22     | 60°C    | 798     |
| X_gEDA_5UTR_F                                  | CTGGGTCTCCTTTTCTTTTGG   | 21     |         |         |
| X_gEDA_5UTR_R                                  | GCAGCTACTGTCCTGCCATC    | 20     | 60°C    | 718     |
| X_gEDA_3UTR_F                                  | TGGGGTAGGATGGTAATGTTG   | 21     |         |         |
| X_gEDA_3UTR_R                                  | TGGTGACTCTTCTGTGCTGTG   | 21     | 60°C    | 794     |
| gEDA2R_Exon1_F                                 | CAGTGTCCATTAGTCCCATAGC  | 22     |         |         |
| gEDA2R_Exon1_R                                 | CCCTCTAGGAAGCCATCTCTC   | 21     | 60°C    | 723     |
| gEDA2R_Exon2_F                                 | GCTCAGACCCAAGTTTCAAGG   | 21     |         |         |
| gEDA2R_Exon2_R                                 | GCATCCCACAAGGTATAAAGAAC | 23     | 60°C    | 665     |
| gEDA2R_Exon3_F                                 | TCCACAGGTAAACAGAGCTCA   | 22     |         |         |
| gEDA2R_Exon3_R                                 | GGGAGGTCAGTCACTATAGGC   | 21     | 60°C    | 877     |
| gEDA2R_Exon4_F                                 | TGACTGCCATACTCTCCAACC   | 21     |         |         |
| gEDA2R_Exon4_R                                 | GGCACCTGTGAGACAAGAAAG   | 21     | 60°C    | 546     |
| gEDA2R_Exon5_6_F                               | GAGGAAGTCCAGACCCAGTG    | 20     |         |         |
| gEDA2R_Exon5_6_R                               | TGATAACCATTCCTGAGACC    | 21     | 60°C    | 760     |
| gEDA2R_Exon7_8_F                               | TTTTCTCTGATCCACCACCAG   | 21     |         |         |
| gEDA2R_Exon7_8_R                               | TACCATTTGTTGTCCCTCCATC  | 21     | 60°C    | 753     |
| gEDA2R_3UTR_F                                  | CAGTAGGGCTAGGGGTAGAGG   | 21     |         |         |
| gEDA2R_3UTR_R                                  | AGTAACACTGGCCATGGAATAG  | 22     | 60°C    | 760     |

|            |                       |    |      |     |
|------------|-----------------------|----|------|-----|
| gWNT_Ex1_F | GAAGCACAGGCTCACTGC    | 18 |      |     |
| gWNT_Ex1_R | CCCCTCTAGTAGCCATCACTC | 21 | 59°C | 735 |
| gWNT_Ex2_F | GTTGGAAGTGAAGGATTATGG | 21 |      |     |
| gWNT_Ex2_R | TTCTGGGTACTTCATCACAGG | 21 | 58°C | 780 |
| gWNT_Ex3_F | CCCCTCTCTGAGTCTATGTCC | 21 |      |     |
| gWNT_Ex3_R | AATGATAAGTTGGGGCTTCC  | 20 | 58°C | 861 |
| gWNT_Ex4_F | AAGACTTGCTGGCAGGTGAC  | 20 |      |     |
| gWNT_Ex4_R | AAAATCTGTCCTGGAGACCAC | 21 | 60°C | 637 |

---
